CORRECTION

## Correction: Validation of the Mentalization Scale (MentS) in francophone control and clinical samples

The *PLOS One* Staff

There are errors in the author affiliations. The correct affiliations are as follows:

Flora Descartes<sup>1</sup>, Vincent Besch<sup>1</sup>, Margaux Bouteloup<sup>1,5</sup>, Rosetta Nicastrò<sup>3,4</sup>,  
Eléonore Pham<sup>3,4</sup>, Eva Rüfenacht<sup>3,4</sup>, Nader Ali Perroud<sup>3,4</sup>, Martin Debbané<sup>1,2</sup>

**1** Developmental Clinical Psychology Research Unit, Faculty of Psychology and Educational Sciences, University of Geneva, Switzerland, **2** Research Department of Clinical, Educational and Health, Psychology, University College London, United Kingdom, **3** Faculty of Medicine, Geneva University, Geneva, Switzerland, **4** Department of Psychiatry, Geneva University Hospitals, Geneva, Switzerland, **5** Université Marie et Louis Pasteur, UFR SLHS, Besançon, France

The publisher apologizes for the errors.

### Reference

1. Descartes F, Besch V, Bouteloup M, Nicastrò R, Pham E, Rüfenacht E, et al. Validation of the Mentalization Scale (MentS) in francophone control and clinical samples. *PLoS One*. 2025;20(10):e0332724. <https://doi.org/10.1371/journal.pone.0332724> PMID: [41150688](https://pubmed.ncbi.nlm.nih.gov/41150688/)

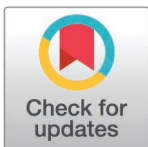

### OPEN ACCESS

**Citation:** The *PLOS One* Staff (2026) Correction: Validation of the Mentalization Scale (MentS) in francophone control and clinical samples. *PLoS One* 21(2): e0342173. <https://doi.org/10.1371/journal.pone.0342173>

**Published:** February 2, 2026

**Copyright:** © 2026 The *PLOS One* Staff. This is an open access article distributed under the terms of the [Creative Commons Attribution License](https://creativecommons.org/licenses/by/4.0/), which permits unrestricted use, distribution, and reproduction in any medium, provided the original author and source are credited.
